# Supplementary material
Source: Springer Nature journal article supplement (https://www.springermedizin.de/resource/supplementary/12936_2013_2671_MOESM1_ESM.pdf/9545084)
Supplement: MOESM1 [file 9545084]

### Additional file 1. Summarized data from experimental hut studies

| Population     | Arm       | UA   | FA  | FD  | UD   | Total | %F     | %D     | $p$ (mg/m <sup>2</sup> ) |
|----------------|-----------|------|-----|-----|------|-------|--------|--------|--------------------------|
| 1 Pitoa        | C,h96     | 154  | 195 | 14  | 38   | 401   | 52.1   | 13.0   | 0.00                     |
|                | P2x0,h96  | 11   | 7   | 9   | 78   | 105   | 15.2   | 82.9   | 76.69                    |
|                | P3x0,h96  | 2    | 7   | 34  | 103  | 146   | 28.1   | 93.8   | 76.39                    |
|                | P2x20,h96 | 99   | 36  | 27  | 148  | 310   | 20.3   | 56.5   | 12.53                    |
|                | P3x20,h96 | 23   | 13  | 27  | 100  | 163   | 24.5   | 77.9   | 10.08                    |
| 2 Kou          | C,h96     | 185  | 679 | 8   | 36   | 908   | 75.7   | 4.8    | 0.00                     |
|                | P2x0,h96  | 90   | 93  | 23  | 123  | 329   | 35.3   | 44.4   | 51.86                    |
|                | P3x0,h96  | 53   | 48  | 48  | 314  | 463   | 20.7   | 78.2   | 115.50                   |
|                | P2x20,h96 | 199  | 351 | 31  | 207  | 788   | 48.5   | 30.2   | 10.61                    |
|                | P3x20,h96 | 175  | 192 | 71  | 286  | 724   | 36.3   | 49.3   | 35.36                    |
| 3 Akron        | C,h96     | 43   | 113 | 8   | 21   | 185   | 65.4   | 15.7   | 0.00                     |
|                | P2x0,h96  | 14   | 50  | 14  | 36   | 114   | 56.1   | 43.9   | 60.00                    |
|                | P3x0,h96  | 12   | 49  | 12  | 55   | 128   | 47.7   | 52.3   | 96.00                    |
|                | P2x20,h96 | 50   | 73  | 8   | 43   | 174   | 46.6   | 29.3   | 8.80                     |
|                | P3x20,h96 | 29   | 78  | 7   | 41   | 155   | 54.8   | 31.0   | 8.40                     |
| 4 Malanville   | C,h96     | 169  | 104 | 3   | 9    | 285   | 37.5   | 4.2    | 0.00                     |
|                | P2x0,h96  | 21   | 6   | 3   | 213  | 243   | 3.7    | 88.9   | 53.17                    |
|                | P3x0,h96  | 7    | 0   | 1   | 206  | 214   | 0.5    | 96.7   | 70.89                    |
|                | P2x20,h96 | 51   | 6   | 6   | 132  | 195   | 6.2    | 70.8   | 30.25                    |
|                | P3x20,h96 | 49   | 14  | 13  | 134  | 210   | 12.9   | 70.0   | 16.19                    |
| 5 Zeneti       | C,h96     | 442  | 173 | 29  | 79   | 723   | 27.9   | 14.9   | 0.00                     |
|                | P2x0,h96  | 20   | 6   | 53  | 495  | 574   | 10.3   | 95.5   | 61.00                    |
|                | P3x0,h96  | 18   | 0   | 11  | 396  | 425   | 2.6    | 95.8   | 100.00                   |
|                | P2x20,h96 | 62   | 14  | 40  | 470  | 586   | 9.2    | 87.0   | 25.00                    |
|                | P3x20,h96 | 23   | 4   | 54  | 477  | 558   | 10.4   | 95.2   | 48.00                    |
| 6 New Bussa AG | C,h96     | 79   | 112 | 3   | 6    | 200   | 57.5   | 4.5    | 0.00                     |
|                | P3x0,h96  | 39   | 0   | 4   | 104  | 147   | 2.7    | 73.5   | 85.00                    |
|                | P3x20,h96 | 57   | 1   | 6   | 88   | 152   | 4.6    | 61.8   | 34.00                    |
| 7 New Bussa AA | C,h96     | 67   | 58  | 2   | 7    | 134   | 44.8   | 6.7    | 0.00                     |
|                | P3x0,h96  | 4    | 0   | 1   | 80   | 85    | 1.2    | 95.3   | 85.00                    |
|                | P3x20,h96 | 9    | 0   | 2   | 85   | 96    | 2.1    | 90.6   | 34.00                    |
| 8 Yaokoffikro  | C,h0      | 674  | 65  | 0   | 52   | 791   | 8.2    | 6.6    | 0.00                     |
|                | P2x0,h0   | 177  | 11  | 5   | 97   | 290   | 5.5    | 35.2   | *60.54                   |
|                | P3x0,h0   | 166  | 19  | 7   | 166  | 358   | 7.3    | 48.3   | *91.76                   |
|                | P2x20,h0  | 139  | 18  | 8   | 99   | 264   | 9.8    | 40.5   | *17.44                   |
|                | P3x20,h0  | 183  | 10  | 1   | 109  | 303   | 3.6    | 36.3   | *23.61                   |
| 9 Van Duc A    | C,h0      | 1822 | 898 | 101 | 1293 | 4114  | 24.282 | 33.884 | 0.00                     |
|                | P2x0,h0   | 215  | 19  | 170 | 2447 | 2851  | 6.629  | 91.792 | 63.90                    |
|                | P3x0,h0   | 136  | 8   | 142 | 3003 | 3289  | 4.560  | 95.621 | 81.60                    |
|                | P2x20,h0  | 536  | 15  | 221 | 2266 | 3038  | 7.768  | 81.863 | 31.50                    |
|                | P3x20,h0  | 220  | 14  | 164 | 2273 | 2671  | 6.664  | 91.239 | 33.60                    |

|             |                |         |        |       |       |     |      |      |      |
|-------------|----------------|---------|--------|-------|-------|-----|------|------|------|
| 10 Ladji CQ | C,h0           | *89.5   | *63.4  | *0.6  | *23.4 | 177 | 36.2 | 13.6 | 0.00 |
|             | C,h96          | *79.1   | *150.0 | *7.0  | *26.9 | 263 | 59.7 | 12.9 | 0.00 |
|             | C,h320         | *53.2   | *162.8 | *7.1  | *24.9 | 248 | 68.5 | 12.9 | 0.00 |
|             | $\alpha$ ,h0   | *110.8  | *35.3  | *19.7 | *21.3 | 187 | 29.4 | 21.9 | NA   |
|             | $\alpha$ ,h96  | *99.0   | *55.9  | *32.2 | *14.9 | 202 | 43.6 | 23.3 | NA   |
|             | $\alpha$ ,h320 | *69.0   | *84.0  | *23.9 | *11.1 | 188 | 57.4 | 18.6 | NA   |
|             | 11 Magugu      | C,h1600 | 40     | 311   | 13    | 44  | 408  | 79.4 | 14.0 |
|             | C,h0           | 56      | 61     | 1     | 105   | 223 | 27.8 | 47.5 | 0.00 |
|             | NN             | 44      | 321.5  | 25.5  | 12    | 403 | 86.1 | 9.3  | 0.00 |
|             | p,h0           | 69      | 35     | 40    | 123   | 267 | 28.1 | 61.0 | NA   |
|             | p,h1600        | 75      | 54     | 70    | 121   | 320 | 38.8 | 59.7 | NA   |

**Legend:**

U = unfed, F = fed, A = alive, D = dead,  $p$  = insecticide concentration after completion of the experimental hut essays, \* = estimated value, C = control net, P2 = PermaNet 2.0, P3 = PermaNet 3.0, x0 = zero washes, x20 = 20 standard WHO washes, h0 = intact ( $h = 0 \text{ cm}^2$ ), h96 = holed 6x4x4 cm ( $h = 96 \text{ cm}^2$ ), h320 = holed 80x2x2 cm ( $h = 320 \text{ cm}^2$ ), h1600 = holed 8x20x10 cm ( $h = 1600 \text{ cm}^2$ ), p = target concentration 200 mg/m<sup>2</sup> permethrin,  $\alpha$  = 40 mg/m<sup>2</sup> target concentration alphacypermethrin, NN = person without a net. Data presented on Magugu excludes gravid mosquitoes.
